# Supplementary material
Source: Springer Nature journal article supplement (https://www.springermedizin.de/resource/supplementary/12933_2014_847_MOESM6_ESM.pdf/9539160)

**A**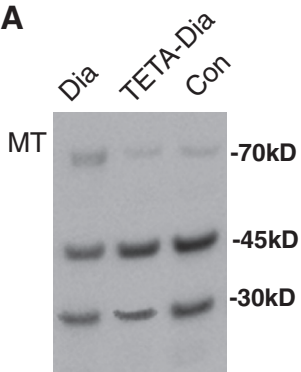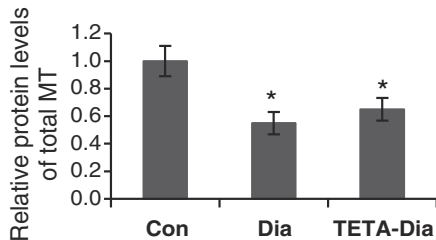**B**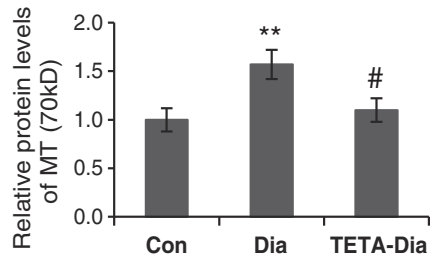**C**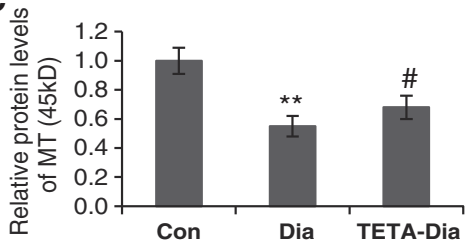**D**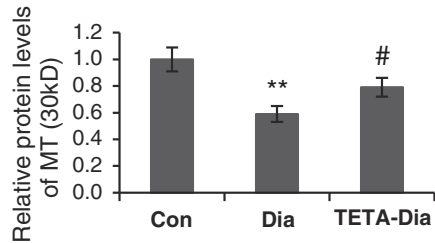

Supplement: MOESM6 [file 9539160]
